# Supplementary material
Source: Springer Nature journal article supplement (https://www.springermedizin.de/resource/supplementary/12955_2012_1116_MOESM3_ESM.pdf/9559232)
Supplement: MOESM3 [file 9559232]

## Formulae

$$\text{Formula 1: } SEM_{\text{stable,ME1-ME2}} = \sqrt{\text{MSE}}$$

Legend:  $SEM_{\text{stable,ME1-ME2}}$ =standard error of measurement for retest; MSE=mean square error obtained from ANOVA

$$\text{Formula 2: } SEM_{\text{stable,ME1-ME3}} = \sqrt{\text{MSE}}$$

Legend:  $SEM_{\text{stable,ME1-ME3}}$ =standard error of measurement of the change in WDQ-G scores; MSE: mean square error obtained from ANOVA

$$\text{Formula 3: } MDC_{95} = SEM_{\text{stable,ME1-ME3}} \times 1.96 \times \sqrt{2}$$

Legend:  $MDC_{95}$ =minimal detectable change at 95% confidence intervall,  $SEM_{\text{stable,ME1-ME3}}$ =standard error of measurement

$$\text{Formula 4: } ES_{\text{Kazis}} = \frac{\overline{ME1}_{\text{improved}} - \overline{ME3}_{\text{improved}}}{SD_{\text{improved,ME1}}}$$

Legend:  $ES_{\text{Kazis}}$ : Kazis' effect size;  $\overline{ME}_{\text{improved}}$ : mean improved results at measurement event one and three respectively;  $SD_{\text{improved,ME1}}$ : standard deviation of improved participants at entry

$$\text{Formula 5: } ES_{\text{Guyatt}} = \frac{\overline{ME1}_{\text{improved}} - \overline{ME3}_{\text{improved}}}{SD_{\text{stable,ME1-ME3}}}$$

Legend:  $ES_{\text{Guyatt}}$ : Guyatt's effect size;  $\overline{ME}_{\text{improved}}$ : mean improved results at measurement event one and three respectively;  $SD_{\text{stable,ME1-ME3}}$ : standard deviation of the score change in stable participants

$$\text{Formula 6: } SRM = \frac{\overline{ME1}_{\text{improved}} - \overline{ME3}_{\text{improved}}}{SD_{\text{improved,ME1-ME3}}}$$

Legend: SRM: Standardised Response Mean;  $\overline{ME}_{\text{improved}}$ : mean improved results at measurement event one and three respectively;  $SD_{\text{improved,ME1}}$ : standard deviation of improved participants at entry
